# Supplementary material for: Deep oxidative desulfurization of dibenzothiophene with {Mo132} nanoballs supported on activated carbon as an efficient catalyst at room temperature
Source: Royal Society of Chemistry journal article supplement (doi:10.1039/c8nj01735b), 2018-01-01
Supplement: c8nj01735b1.pdf [file c8nj01735b1.pdf]

## Electronic Supplementary Information

### **Deep oxidative desulfurization of dibenzothiophene with {Mo<sub>132</sub>} nanoball supported on activated carbon as efficient catalyst at room temperature**

**Ali Mojaverian Kermani<sup>a</sup>, Ali Ahmadpour<sup>a,\*</sup>, Tahereh Rohani Bastami<sup>b</sup>, Mahboube Ghahramaninezhad<sup>b</sup>**

<sup>a</sup> Department of Chemical Engineering, Faculty of Engineering, Ferdowsi University of Mashhad, Mashhad, Iran

<sup>b</sup> Department of Chemical Engineering, Quchan University of Technology, Quchan, Iran

\*Corresponding author: Tel/fax: +98 51 38805006;  
E-mail address: ahmadpour@um.ac.ir

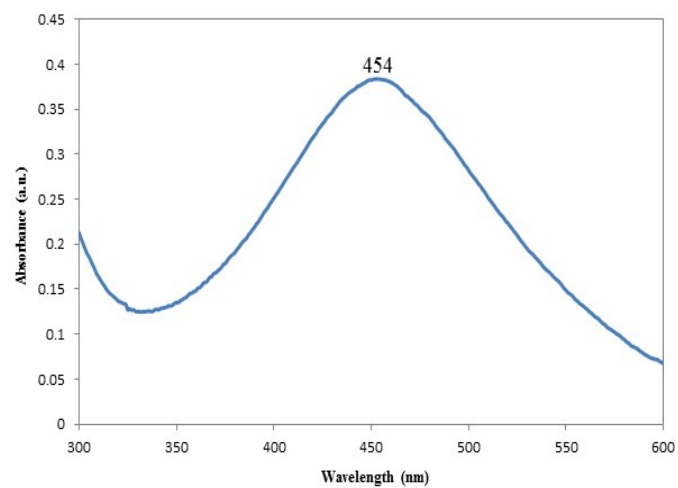

**Fig. S1.** UV-Vis spectrum of {Mo<sub>132</sub>} aqueous solution

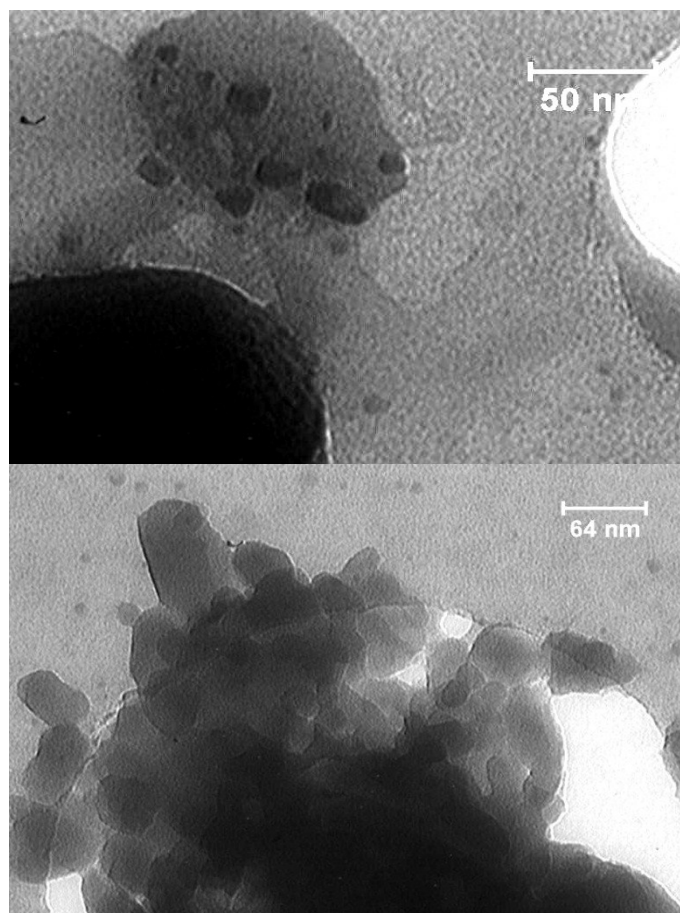

**Fig. S2.** TEM images of prepared {Mo<sub>132</sub>} in ethanol

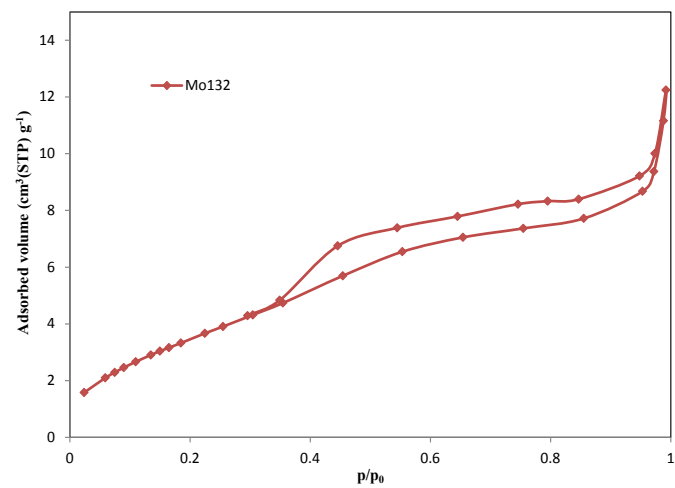

**Fig. S3.** Nitrogen adsorption/desorption isotherms of {Mo<sub>132</sub>}

### H<sub>2</sub>-TPR analysis:

The H<sub>2</sub>-temperature programmed reduction (H<sub>2</sub>-TPR) experiment was performed on 50 mg of the catalyst ( $\{\text{Mo}_{132}\}/\text{AC-20}$ ) placed in a U-shaped quartz reactor. Prior to the TPR run, the catalyst was degassed in flow of 10 sccm Ar at 110°C for 1 hour, and cooled down to 40°C. Then, the sample was heated from 40 to 900°C at a heating rate of 10°C/min in a flow of 5% H<sub>2</sub>/Ar mixture (10 sccm).

The H<sub>2</sub>-TPR was employed to study the reducibility of the catalyst. As shown in Fig. S4,  $\{\text{Mo}_{132}\}/\text{AC-20}$  exhibited two reduction peaks, a sharp peak at 560°C and a weak peak at higher temperature of 710 °C. These two peaks indicate reduction of Mo<sup>VI</sup> and Mo<sup>VI</sup> in  $\{\text{Mo}_{132}\}$  cluster in the catalyst.

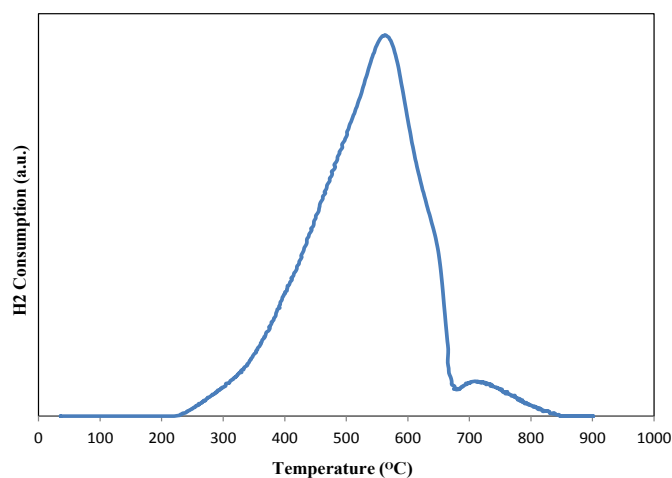

**Fig. S4.** H<sub>2</sub>-TPR profile of  $\{\text{Mo}_{132}\}/\text{AC-20}$

**Table S1***Reusability of {Mo<sub>132</sub>}/AC-20 and {Mo<sub>132</sub>} content of the catalyst in each step*

| Catalyst samples      | DBT removal (%) | Actual {Mo <sub>132</sub> } contents (%) |
|-----------------------|-----------------|------------------------------------------|
| Fresh catalyst        | 99.5            | 9.04                                     |
| 1 <sup>st</sup> reuse | 98.1            | 8.59                                     |
| 2 <sup>nd</sup> reuse | 97.8            | 8.38                                     |
| 3 <sup>rd</sup> reuse | 97.7            | 8.35                                     |

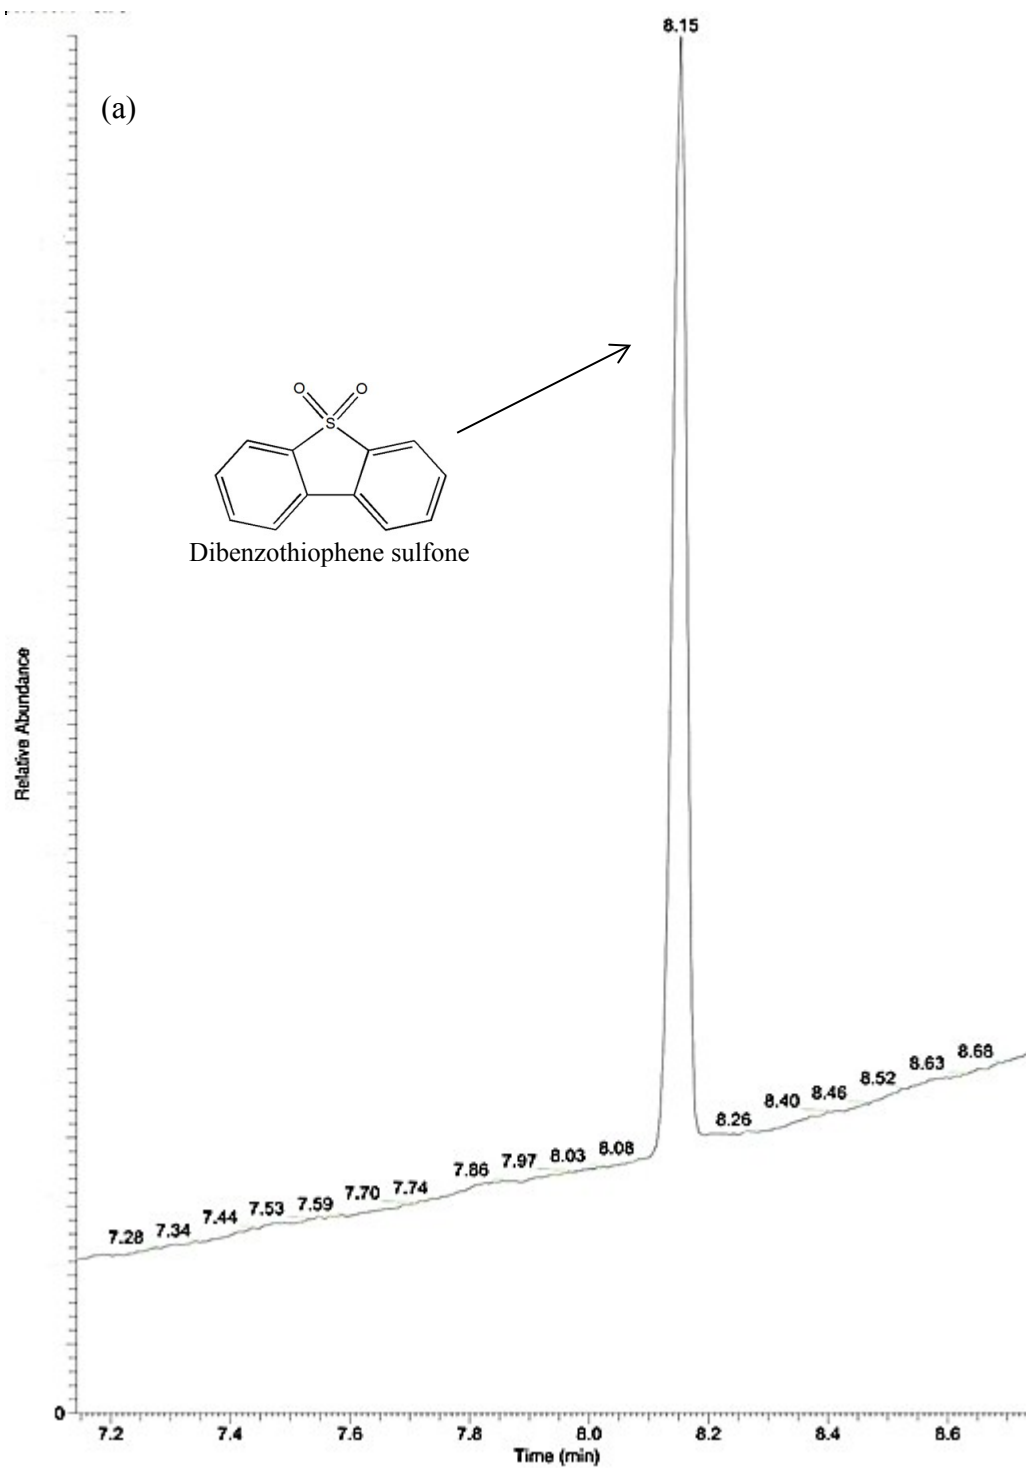

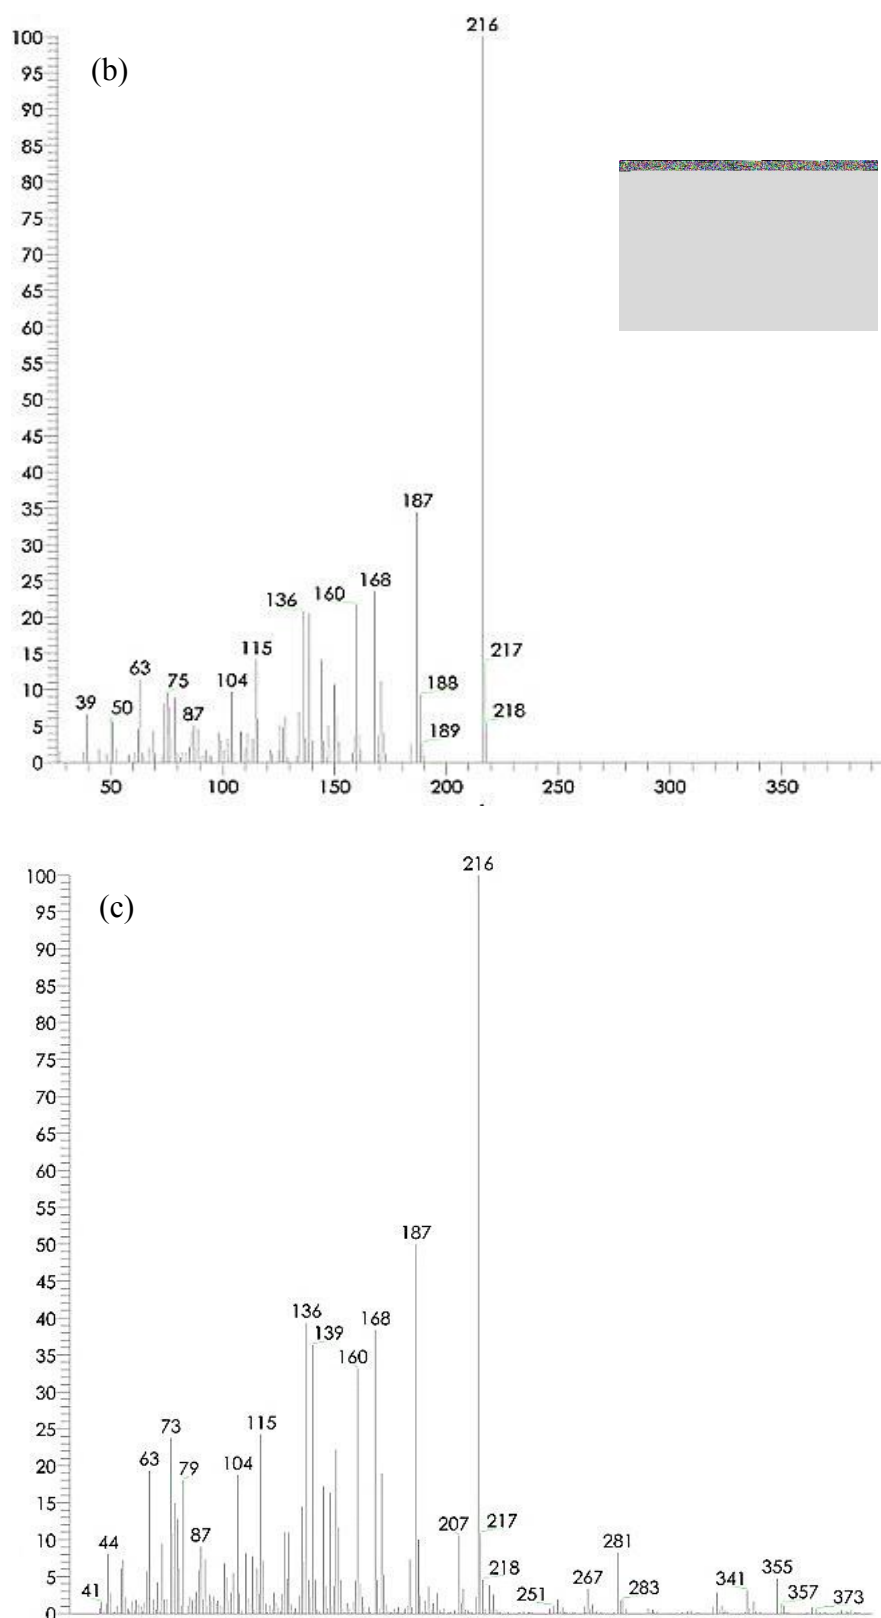

**Fig. S5.** GC-MS analysis of the acetonitrile phase at the end of the process. (a) GC-MS chromatogram, (b) The standard mass spectrum of DBT sulfone, (c) The mass spectrum of the oxidation product of DBT. Reaction condition:  $T = 25\text{ }^{\circ}\text{C}$ ,  $\{\text{Mo}_{132}\}/\text{AC-20}$  catalyst dosage = 0.0025 g cat/ g F, O/S = 10,  $t = 30$  min, initial sulfur content = 500 ppm.
